# Supplementary material for: Transcriptome signatures of the medial prefrontal cortex underlying GABAergic control of resilience to chronic stress exposure
Source: PubMed Central journal article supplement — bioRxiv. 2024 Jul 10:2024.07.10.602959. Preprint. [Version 1] doi: 10.1101/2024.07.10.602959 (PMC11257543; doi:10.1101/2024.07.10.602959), 2024-07-10
Supplement: media-1.pdf [file media-1.pdf]

## SUPPLEMENTARY INFORMATION

### **“Transcriptome signatures of the medial prefrontal cortex underlying GABAergic control of resilience to chronic stress exposure**

Meiyu Shao<sup>1,3</sup>, Julia Botvinov<sup>1</sup>, Deepro Banerjee<sup>2,3</sup>, Santhosh Girirajan<sup>2,3</sup>, and Bernhard Lüscher<sup>1,2,3</sup>

<sup>1</sup>Department of Biology, The Pennsylvania State University, University Park, PA 16802

<sup>2</sup>Department of Biochemistry and Molecular Biology, The Pennsylvania State University, University Park, PA 16802

<sup>3</sup>The Huck Institutes of the Life Sciences, The Pennsylvania State University, University Park, PA 16802

Correspondence: Bernhard Luscher, Ph.D, Department of Biology, Penn State University, 301 Life Sciences Building, University Park, PA 16802, E-mail: BXL25@psu.edu, Phone office: 814-865 5549

## SUPPLEMENTARY FIGURES

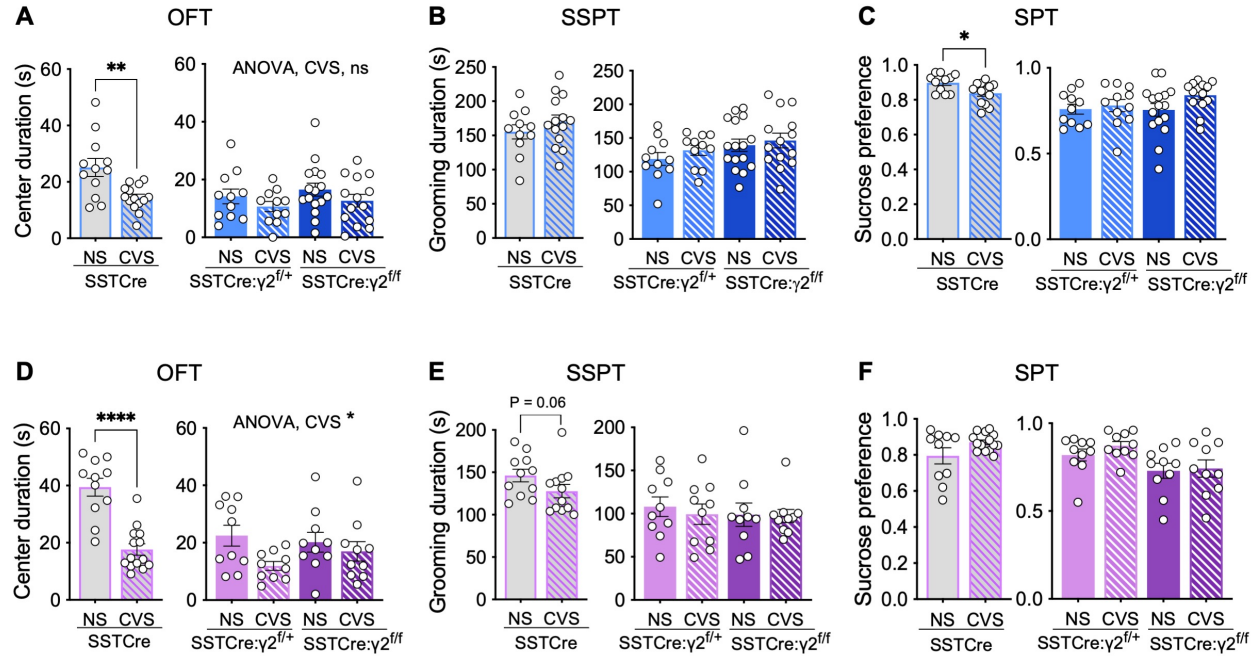

**Figure S1. SSTCre:γ2<sup>fl/fl</sup> mice are resilient to CVS-induced behavior independent of sex. A–C) Male mice.** In the OFT (A), CVS reduced the center duration in SSTCre mice ( $p < 0.01$ , t-test), but not SSTCre:γ2<sup>fl/+</sup> and SSTCre:γ2<sup>fl/fl</sup> mice. In the SSPT (B), CVS had no effect on grooming duration independent of genotype. In the SPT (C), CVS reduced the sucrose preference of SSTCre mice ( $p < 0.05$ , t-test) but not SSTCre:γ2<sup>fl/+</sup> and SSTCre:γ2<sup>fl/fl</sup> mice ( $F_{1, 48} = 2.56$ ,  $p$ , ns). **D–F) Female mice.** In the OFT (D), CVS reduced the center duration of SSTCre mice ( $p < 0.0001$ ) with less robust effects in the SSTCre:γ2<sup>fl/+</sup> and SSTCre:γ2<sup>fl/fl</sup> mutants ( $F_{1, 36} = 4.866$ ,  $p < 0.05$ ). In the SSPT (E), CVS resulted in a trend of a reduction in grooming duration in SSTCre ( $p = 0.06$ , Mann Whitney test), but not SSTCre:γ2<sup>fl/+</sup> and SSTCre:γ2<sup>fl/fl</sup> mice ( $F_{1, 36} = 0.2067$ , ns). In the SPT (F), CVS had on effect on sucrose preference independent of genotype. Bar graph represent means  $\pm$  SE. \* $p < 0.05$ ,  $n = 11–14$  for all groups, t-test or Mann Whitney test.

| <b>CVS SSTCre:γ2<sup>fl</sup> vs. NS SSTCre:γ2<sup>fl</sup> (Figure 3F, 4J, upregulated pathways)</b> |          |         |                                                                             |
|-------------------------------------------------------------------------------------------------------|----------|---------|-----------------------------------------------------------------------------|
| Pathways                                                                                              | p value  | Z-score | Molecules                                                                   |
| Translation termination                                                                               | 1.00e-04 | 2       | Rps26, Rps28, Rps29, Rpsa                                                   |
| Translation elongation                                                                                | 1.05e-04 | 2       | Rps26, Rps28, Rps29, Rpsa                                                   |
| rRNA processing                                                                                       | 1.15e-04 | 2.24    | Fbl,Rps26, Rps28, Rps29, Rpsa                                               |
| Response of EIF2AK4                                                                                   | 1.45e-04 | 2       | Rps26, Rps28, Rps29, Rpsa                                                   |
| SRP mediated protein targeting                                                                        | 2.19e-04 | 2       | Rps26, Rps28, Rps29, Rpsa                                                   |
| Nonsense-mediated decay                                                                               | 2.34e-04 | 2       | Rps26, Rps28, Rps29, Rpsa                                                   |
| Translation initiation                                                                                | 2.75e-04 | 2       | Rps26, Rps28, Rps29, Rpsa                                                   |
| <b>CVS SSTCre vs. NS SSTCre (Figure 3F, downregulated pathways)</b>                                   |          |         |                                                                             |
| Pathways                                                                                              | p value  | Z-score | Molecules                                                                   |
| IGF transport and uptake                                                                              | 8.32e-04 | -2.83   | Ccn1, Chrdl1, Ckap4, Cp, Lamc1, Nucb1, Pappa2, Vwa1                         |
| Protein phosphorylation                                                                               | 1.62e-03 | -2.65   | Ccn1, Chrdl1, Ckap4, Cp, Lamc1, Nucb1, Vwa1                                 |
| G alpha (i) signaling                                                                                 | 2.95e-03 | -2.71   | Apln, Cx3Cl1, Cxcl12, Gng12, Gng5, Gpr17, Gpr37L1, Grm3, Rgs11, Rgs5, S1Pr2 |
| EphR signaling                                                                                        | 5.13e-03 | -2      | Akt2, Cxcl12, Efnb1, Epha8, Ephb2, Gng12, Gng5, Map3K14, Map4K4             |
| Degeneration of extracellular matrix                                                                  | 2.09e-02 | -2      | Adamts1, Bsg, Lamc1, Mmp14                                                  |
| Cell junction                                                                                         | 1.58e-02 | -2.24   | Cd151, Cldn5, Fermt2, Jup, Parvb                                            |
| Signaling by VEGF                                                                                     | 2.88e-02 | -2.24   | Akt2, Jup, Kdr, Mapkapk2, Nos3                                              |
| <b>Red quadrants in Figure 3C, D</b>                                                                  |          |         |                                                                             |
| Pathways                                                                                              | p value  | Z-score | Molecules                                                                   |
| Translation termination                                                                               | 1.00e-04 | 2       | Rps26, Rps28, Rps29, Rpsa                                                   |
| Translation elongation                                                                                | 1.05e-04 | 2       | Rps26, Rps28, Rps29, Rpsa                                                   |
| rRNA processing                                                                                       | 1.15e-04 | 2.24    | Fbl,Rps26, Rps28, Rps29, Rpsa                                               |
| Response of EIF2AK4                                                                                   | 1.45e-04 | 2       | Rps26, Rps28, Rps29, Rpsa                                                   |
| SRP mediated protein targeting                                                                        | 2.19e-04 | 2       | Rps26, Rps28, Rps29, Rpsa                                                   |
| Nonsense-mediated decay                                                                               | 2.34e-04 | 2       | Rps26, Rps28, Rps29, Rpsa                                                   |
| Translation initiation                                                                                | 2.75e-04 | 2       | Rps26, Rps28, Rps29, Rpsa                                                   |
| Class I MHC mediated antigen processing and presentation                                              | 9.93e-01 | 1.63    | Fbxl5, Lmo7, Nedd4L, Psmb4, Wwp1, Zbtb16                                    |
| Mitotic G2-G2/M phases                                                                                | 9.88e-01 | -1      | Cep70, Nde1, Psmb4, Tubb2B                                                  |
| Gustation Pathway                                                                                     | 9.53e-01 | 2       | Cacnb2, Gabra4, Gabrd, Scn4B                                                |

**Figure S2. Key genes underlying differential pathway activation and inhibition**

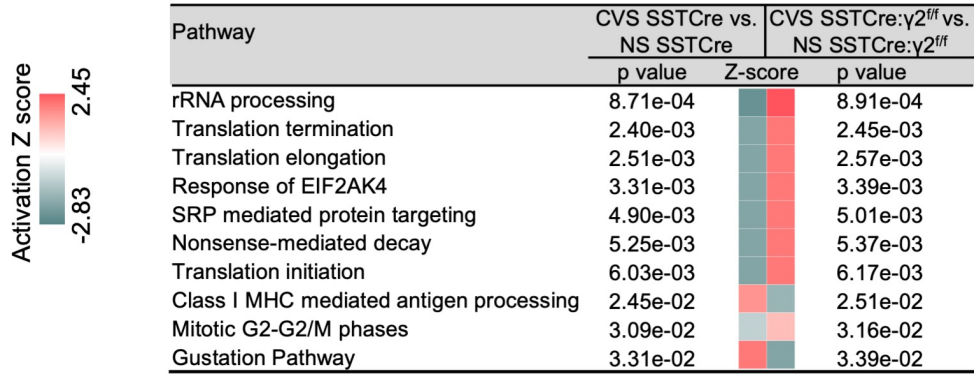

**Figure S3. IPA of genes differentially affected by CVS in SSTCre compared to SSTCre:γ2<sup>flf</sup> mice.** IPA of the sum of the 180 genes in the four red quadrants of Figure 3C and D that showed opposite CVS effects in stress vulnerable compared to stress resilient mice. Shown are the top 10 pathways affected based on z-scores, displayed from top to bottom in order of increasing p value. Note that nine of the ten most prominently affected pathways are downregulated by CVS in stress vulnerable mice and upregulated by CVS in stress-resilient mice.

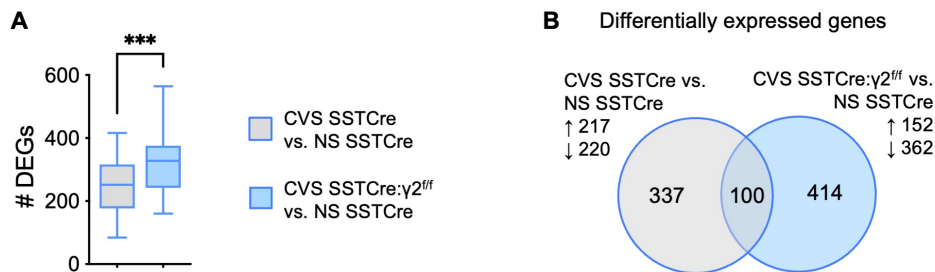

**Figure S4. Comparison of DEGs between CVS exposed SSTCre:γ2<sup>flf</sup> stress-resilient male mice vs. NS SSTCre controls and CVS exposed SSTCre stress-vulnerable vs. NS SSTCre controls.** **A)** The average number of CVS plus genotype induced DEGs ( $p < 0.01$ ) in CVS SSTCre:γ2<sup>flf</sup> vs. NS SSTCre is greater than the DEGs of CVS SSTCre vs. NS SSTCre. **B)** Venn diagram of DEGs \*\*\* $p < 0.001$ , t-test.

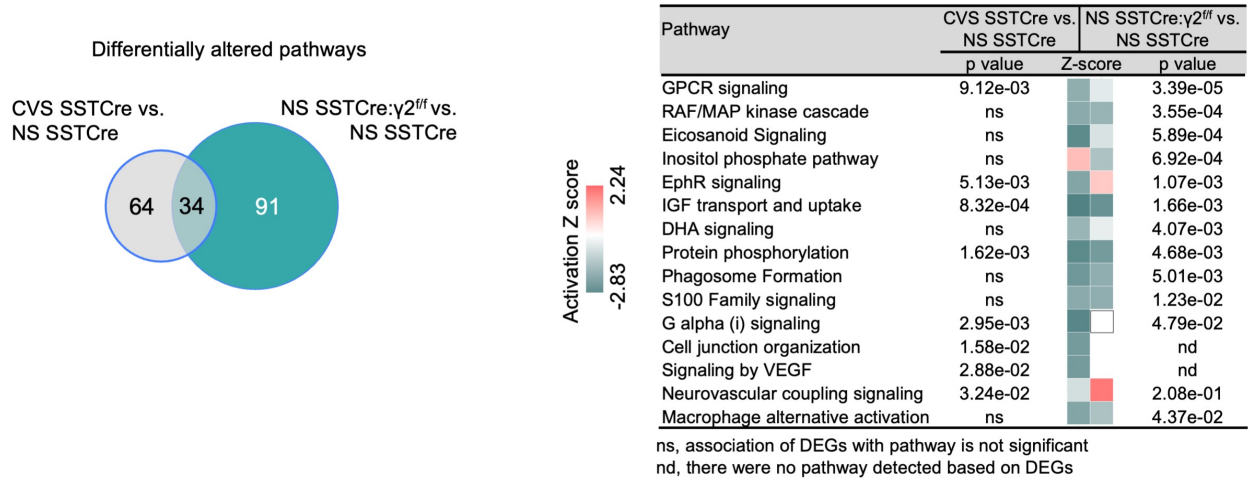

**Figure S5. Venn diagram illustrating overlap between pathways induced by CVS in SSTCre stress-vulnerable mice and disinhibition of SST neurons in the absence of stress [NS SSTCre:γ2<sup>ff</sup> vs. NS SSTCre mice].** Note that most pathways are inhibited under both conditions. White squares indicate pathways that were detected but a directional Z-score could not be determined. ns, not significant; nd, not detected.

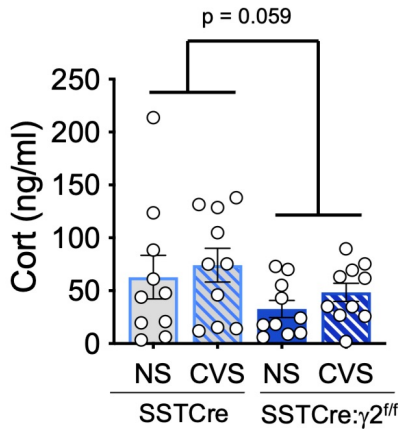

**Figure S6. Analyses of serum corticosterone.** The serum of CVS-exposed, NS SSTCre and SSTCre:γ2<sup>ff</sup> male mice harvested 9 days after the end of CVS was subjected to Cort measurements by ELISA. The Cort levels trended lower in stress resilient mice compared to SSTCre controls ( $F_{1, 36} = 3.81$ ,  $p = 0.059$ ). Bar graphs represent means  $\pm$  SE.

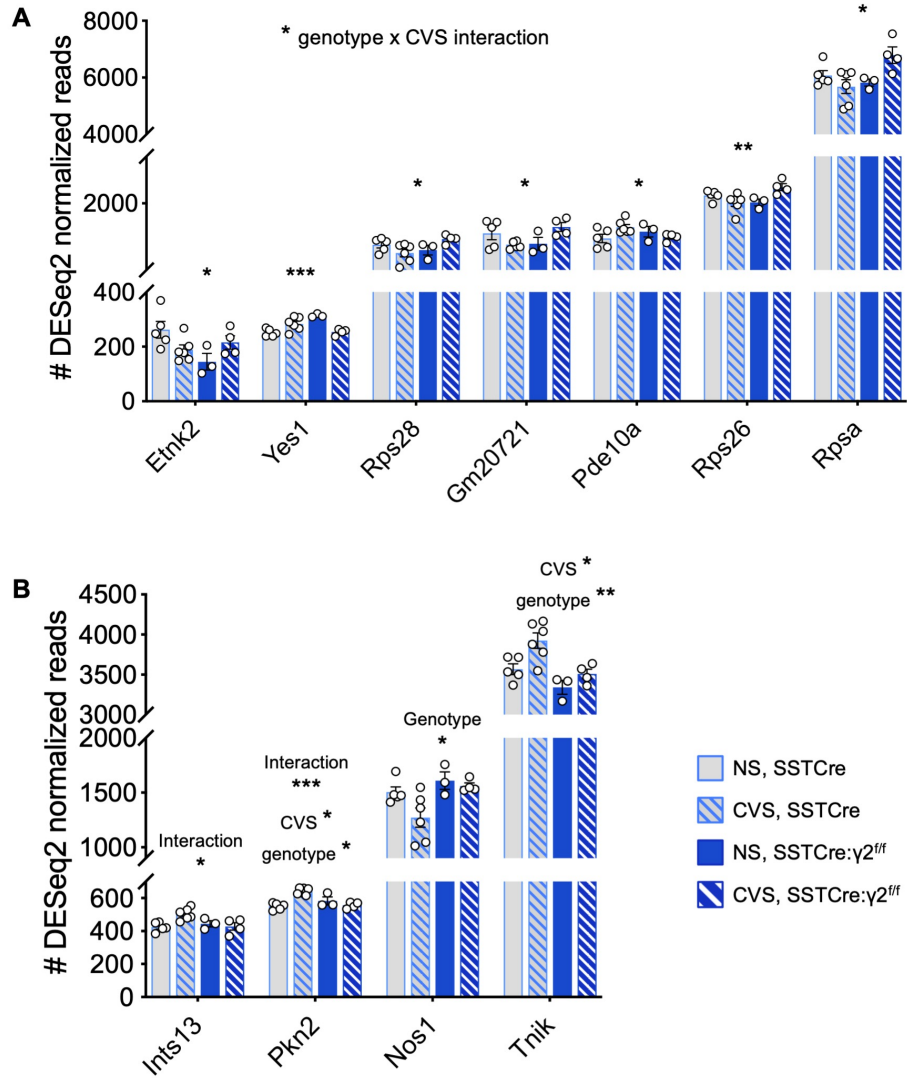

**Figure S7. Two mRNA expression patterns of putative stress-resilient genes. A)** Representative genes that show similar changes in expression in CVS SSTCre and NS SSTCre:γ2<sup>fl/fl</sup> compared to NS SSTCre mice that is then normalized by CVS in SSTCre:γ2<sup>fl/fl</sup> mice towards NS SSTCre levels, 2-way ANOVAs showed a genotype x CVS interaction for all these genes: *Etnk2* ( $F_{1,14} = 7.521$ ,  $p = 0.0159$ ), *Yes1* ( $F_{1,14} = 27.89$ ,  $p = 0.0001$ ), *Rps28* ( $F_{1,14} = 6.508$ ,  $p = 0.0231$ ), *Gm20721* ( $F_{1,14} = 8.840$ ,  $p = 0.0101$ ), *Pde10a* ( $F_{1,14} = 5.254$ ,  $p = 0.0379$ ), *Rps26* ( $F_{1,14} = 10.44$ ,  $p = 0.0060$ ), *Rpsa* ( $F_{1,14} = 7.783$ ,  $p = 0.0145$ ). **B)** Representative genes that show smaller CVS effects in SSTCre:γ2<sup>fl/fl</sup> vs. SSTCre mice. *Ints13*, showed a genotype x CVS interaction ( $F_{1,14} = 7.395$ ,  $p = 0.0166$ ). Genotype, CVS and interaction effects were found for *Pkn2* (Genotype,  $F_{1,14} = 4.654$ ,  $p = 0.0489$ ; CVS,  $F_{1,14} = 7.764$ ,  $p = 0.0146$ ; interaction,  $F_{1,14} = 24.5$ ,  $p = 0.0002$ ). *Nos1* showed a genotype effect ( $F_{1,14} = 7.055$ ,  $p = 0.0188$ ). *Tnik* showed CVS ( $F_{1,14} = 8.777$ ,  $p = 0.0103$ ) and genotype effects ( $F_{1,14} = 13.29$ ,  $p = 0.0026$ ; CVS,). \* $p < 0.05$ , \*\* $p < 0.01$ , \*\*\* $p < 0.001$ .
